# Supplementary material for: Analgesic effects of lappaconitine in leukemia bone pain in a mouse model
Source: PeerJ. 2015 May 7;3:e936. doi: 10.7717/peerj.936 (PMC4435501; doi:10.7717/peerj.936)
Supplement: Supplemental Information 2 [file peerj-03-936-s002.xlsx]

## Sheet: 第三批小鼠跛行评分
normal group	NO.1	NO.2	NO.3	NO.4	NO.5	NO.6	NO.7	NO.8	NO.9	NO.10
0d	0	0	0	0	0	0	0	0	0	0
1d	0	0	0	0	0	0	0	0	0	0
3d	0	0	0	0	0	0	0	0	0	0
5d	0	0	0	0	0	0	0	0	0	0
7d	0	0	0	0	0	0	0	0	0	0
9d	0	0	0	0	0	0	0	0	0	0
11d	0	0	0	0	0	0	0	0	0	0
13d	0	0	0	0	0	0	0	0	0	0
15d	0	0	0	0	0	0	0	0	0	0
0.5h	0	0	0	0	0	0	0	0	0	0
2.5h	0	0	0	0	0	0	0	0	0	0
4h	0	0	0	0	0	0	0	0	0	0
17d	0	0	0	0	0	0	0	0	0	0
0.5h	0	0	0	0	0	0	0	0	0	0
2.5h	0	0	0	0	0	0	0	0	0	0
4h	0	0	0	0	0	0	0	0	0	0
19d	0	0	0	0	0	0	0	0	0	0
0.5h	0	0	0	0	0	0	0	0	0	0
2.5h	0	0	0	0	0	0	0	0	0	0
4h	0	0	0	0	0	0	0	0	0	0
21d	0	0	0	0	0	0	0	0	0	0
0.5h	0	0	0	0	0	0	0	0	0	0
2.5h	0	0	0	0	0	0	0	0	0	0
4h	0	0	0	0	0	0	0	0	0	0
NS group	NO.1	NO.2	NO.3	NO.4	NO.5	NO.6	NO.7	NO.8	NO.9	NO.10
0d	0	0	0	0	0	0	0	0	0	0
1d	2	1	1	1	2	1	2	1	2	1
3d	2	1	1	1	1	1	1	1	1	1
5d	1	1	0	0	0	1	2	0	2	0
7d	1	1	0	0	1	1	1	0	1	0
9d	1	1	0	0	0	0	1	0	0	0
11d	0	0	0	1	0	0	0	0	0	0
13d	1	1	0	0	0	0	0	0	0	0
15d	0	1	0	0	0	0	0	0	0	0
0.5h	1	1	0	0	0	0	0	0	0	0
2.5h	1	1	0	0	0	0	0	0	0	0
4h	1	1	0	0	0	0	0	0	0	0
17d	0	0	0	0	0	0	0	0	0	0
0.5h	0	0	0	0	0	0	0	0	0	0
2.5h	0	0	0	0	0	0	0	0	0	0
4h	0	0	0	0	0	0	0	0	0	0
19d	0	0	0	0	0	0	0	0	0	0
0.5h	0	0	0	0	0	0	0	0	0	0
2.5h	0	0	0	0	0	0	0	0	0	0
4h	0	0	0	0	0	0	0	0	0	0
21d	0	0	0	0	0	0	0	0	0	0
0.5h	0	0	0	0	0	0	0	0	0	0
2.5h	0	0	0	0	0	0	0	0	0	0
4h	0	0	0	0	0	0	0	0	0	0
lappaconitine group	NO.1	NO.2	NO.3	NO.4	NO.5	NO.6	NO.7	NO.8	NO.9	NO.10
0d	0	0	0	0	0	0	0	0	0	0
1d	0	1	-	1	1	1	-	1	1	2
3d	0	1	-	0	1	0	-	0	1	2
5d	0	1	-	0	1	1	-	0	0	3
7d	1	1	-	1	3	1	-	1	1	3
9d	1	1	-	1	2	1	-	1	1	3
11d	2	1	-	1	2	1	-	1	1	1
13d	1	2	-	2	2	2	-	1	2	3
15d	2	2	-	2	2	2	-	2	2	3
0.5h	1	1	-	2	2	1	-	1	1	0
2.5h	1	1	-	0	1	1	-	1	0	0
4h	1	1	-	1	1	1	-	2	0	0
17d	2	1	-	2	2	2	-	2	2	3
0.5h	1	1	-	1	1	1	-	2	1	2
2.5h	1	1		1	0	0	-	0	0	0
4h	0	1		0	0	0	-	1	0	0
19d	1	3	-	3	2	2	-	2	2	2
0.5h	1	1	-	1	2	1	-	1	2	1
2.5h	1	1	-	1	1	1	-	0	0	0
4h	1	0	-	1	1	0	-	1	1	1
21d	2	2	-	2	3	2	-	2	2	1
0.5h	1	1	-	2	2	1	-	2	1	1
2.5h	0	0	-	1	1	1	-	1	1	0
4h	0	0	-	1	1	0	-	1	1	1
K562 cells group	NO.1	NO.2	NO.3	NO.4	NO.5	NO.6	NO.7	NO.8	NO.9	NO.10	NO.11	NO.12	NO.13	NO.14	NO.15
0d	0	0	0	0	0	0	0	0	0	0	0	0	0	0	0
1d	2	3	2	0	2	0	1	0	2	1	0	2	1	0	0
3d	0	0	0	0	2	0	1	0	1	1	0	1	0	0	0
5d	0	1	0	0	0	0	1	1	0	1	0	1	1	0	0
7d	1	1	0	1	2	1	1	1	1	0	0	0	0	1	0
9d	2	2	1	1	2	2	1	2	1	2	1	1	1	2	1
11d	1	2	2	2	2	2	1	2	1	2	1	2	1	2	1
13d	1	2	2	3	2	2	2	3	2	2	2	2	2	2	1
15d	2	2	3	3	2	3	3	3	3	3	3	3	4	2	2
0.5h	2	2	3	3	2	3	3	3	3	3	3	3	4	2	2
2.5h	2	2	3	3	2	3	3	3	3	3	3	3	4	2	2
4h	2	2	3	3	2	3	3	3	3	3	3	3	4	2	2
17d	2	2	3	3	3	3	2	3	3	3	3	3	3	2	2
0.5h	2	2	3	3	3	3	2	3	3	3	3	3	3	2	2
2.5h	2	2	3	3	2	3	3	3	3	3	3	3	4	2	2
4h	2	2	3	3	3	3	3	3	3	3	3	3	3	2	2
19d	2	2	3	3	3	3	2	3	2	3	3	3	3	2	2
0.5h	2	2	3	3	3	3	2	3	2	3	3	3	3	2	2
2.5h	2	2	3	3	3	3	2	3	3	3	3	3	3	2	2
4h	2	2	3	3	3	3	2	3	3	3	3	3	3	2	2
21d	3	3	3	3	3	4	3	3	3	4	3	3	3	3	3
0.5h	3	3	3	3	3	3	3	3	3	3	3	3	3	3	2
2.5h	3	3	3	3	3	3	3	3	3	3	3	3	3	3	2
4h	3	3	3	3	3	3	3	3	3	3	3	3	3	3	2

## Sheet: 第四批小鼠跛行评分
normal group	NO.1	NO.2	NO.3	NO.4	NO.5
0d	0	0	0	0	0
1d	0	0	0	0	0
3d	0	0	0	0	0
5d	0	0	0	0	0
7d	0	0	0	0	0
9d	0	0	0	0	0
11d	0	0	0	0	0
13d	0	0	0	0	0
15d	0	0	0	0	0
0.5h	0	0	0	0	0
2.5h	0	0	0	0	0
4h	0	0	0	0	0
17d	0	0	0	0	0
0.5h	0	0	0	0	0
2.5h	0	0	0	0	0
4h	0	0	0	0	0
19d	0	0	0	0	0
0.5h	0	0	0	0	0
2.5h	0	0	0	0	0
4h	0	0	0	0	0
21d	0	0	0	0	0
0.5h	0	0	0	0	0
2.5h	0	0	0	0	0
4h
NS group	NO.1	NO.2	NO.3	NO.4	NO.5
0d	1	1	2	1	0
1d	0	0	0	0	0
3d	0	0	0	0	0
5d	0	0	0	0	0
7d	0	0	0	0	0
9d	0	0	0	0	0
11d	0	0	0	0	0
13d	0	0	0	0	0
15d	0	0	0	0	0
0.5h	0	0	0	0	0
2.5h	0	0	0	0	0
4h	0	0	0	0	0
17d	0	0	0	0	0
0.5h	0	0	0	0	0
2.5h	0	0	0	0	0
4h	0	0	0	0	0
19d	0	0	0	0	0
0.5h	0	0	0	0	0
2.5h	0	0	0	0	0
4h	0	0	0	0	0
21d	0	0	0	0	0
0.5h	0	0	0	0	0
2.5h	0	0	0	0	0
4h
lappaconitine group	NO.1	NO.2	NO.3	NO.4	NO.5	NO.6	NO.7	NO.8	NO.9	NO.10
0d	0	0	0	0	0	1	0	1	0	1
1d	0	0	0	0	0	1	0	0	1	1
3d	0	0	0	0	0	1	0	0	0	0
5d	1	1	0	1	0	2	1	1	1	1
7d	1	1	0	1	1	2	1	1	1	1
9d	1	1	1	1	1	1	1	1	1	1
11d	1	2	2	2	2	2	2	2	2	2
13d	2	1	1	2	2	2	2	2	2	1
15d	2	2	2	1	2	1	1	2	2	1
0.5h	1	2	0	1	1	1	0	1	0	1
2.5h	1	2	1	1	1	1	1	1	1	2
4h	2	2	2	2	3	2	2	2	1	2
17d	1	2	1	1	2	2	1	1	1	2
0.5h	1	1	0	1	1	1	1	0	1	1
2.5h	1	0	0	1	1	1	1	1	1	0
4h	1	2	2	2	2	2	2	2	1	2
19d	1	2	1	1	1	1	1	2	1	2
0.5h	1	2	1	1	1	1	1	1	1	1
2.5h	1	1	1	0	1	1	0	1	1	1
4h	2	2	2	3	3	2	2	2	2	3
21d	2	2	2	1	2	2	2	1	1	2
0.5h	1	1	2	1	2	1	1	1	0	1
2.5h	1	1	0	1	2	1	1	1	1	1
4h
K562 cells group	NO.1	NO.2	NO.3	NO.4	NO.5	NO.6	NO.7	NO.8	NO.9	NO.10	NO.11	NO.12	NO.13	NO.14	NO.15
0d	0	0	0	0	0	0	0	0	0	0	0	0	0	0	0
1d	2	3	2	0	2	0	1	0	2	1	0	2	1	0	0
3d	0	0	0	0	2	0	1	0	1	1	0	1	0	0	0
5d	0	1	0	0	0	0	1	1	0	1	0	1	1	0	0
7d	1	1	0	1	2	1	1	1	1	0	0	0	0	1	0
9d	2	2	1	1	2	2	1	2	1	2	1	1	1	2	1
11d	1	2	2	2	2	2	1	2	1	2	1	2	1	2	1
13d	1	2	2	3	2	2	2	3	2	2	2	2	2	2	1
15d	2	2	3	3	2	3	3	3	3	3	3	3	4	2	2
0.5h	2	2	3	3	2	3	3	3	3	3	3	3	4	2	2
2.5h	2	2	3	3	2	3	3	3	3	3	3	3	4	2	2
4h	2	2	3	3	2	3	3	3	3	3	3	3	4	2	2
17d	2	2	3	3	3	3	2	3	3	3	3	3	3	2	2
0.5h	2	2	3	3	3	3	2	3	3	3	3	3	3	2	2
2.5h	2	2	3	3	2	3	3	3	3	3	3	3	4	2	2
4h	2	2	3	3	3	3	3	3	3	3	3	3	3	2	2
19d	2	2	3	3	3	3	2	3	2	3	3	3	3	2	2
0.5h	2	2	3	3	3	3	2	3	2	3	3	3	3	2	2
2.5h	2	2	3	3	3	3	2	3	3	3	3	3	3	2	2
4h	2	2	3	3	3	3	2	3	3	3	3	3	3	2	2
21d	3	3	3	3	3	4	3	3	3	4	3	3	3	3	3
0.5h	3	3	3	3	3	3	3	3	3	3	3	3	3	3	2
2.5h	3	3	3	3	3	3	3	3	3	3	3	3	3	3	2
4h	3	3	3	3	3	3	3	3	3	3	3	3	3	3	2
